# 1                                    **Within the fortress: A specialized parasite of ants is not evicted**

2                    Emilia S. Gracia<sup>1</sup>, Charissa de Bekker<sup>2</sup>, Jim Russell<sup>3</sup>, Kezia Manlove<sup>4</sup>, Ephraim Hanks<sup>3</sup>  
3 and David P. Hughes<sup>2</sup>

4                    <sup>1</sup>Ecology, Department of Entomology and Center for Infectious Disease Dynamics, Pennsylvania State  
5 University, University Park, State College, PA 16801

6                    <sup>2</sup> Department of Entomology and Department of Biology, Center for Infectious Disease Dynamics,  
7 Pennsylvania State University, University Park, State College, PA 16801

8                    <sup>3</sup> Department of Statistics, Center for Infectious Disease Dynamics, Pennsylvania State University,  
9 University Park, State College, PA 16801

10                    <sup>4</sup> Department of Biology, Center for Infectious Disease Dynamics, Pennsylvania State University,  
11 University Park, State College, PA 16801

## 12                    **ABSTRACT**

13

14                    **Key words-** Social parasite, individual behavior, *Ophiocordyceps unilateralis*,  
15 *Camponotus castaneus*, behavioral manipulation, kin selection

## 16                    **INTRODUCTION**

17 Every level of biological organization from cells to societies require that composing units come  
18 together to form parts of a bigger unit (1). Where the composing units are themselves  
19 individuals, as in the case of social insects, the success of the group requires these units to be  
20 altruistic; explaining this behavior is conceptually challenging because one animal provides a  
21 benefit to another at a cost to itself. The seminal contribution of W.D. Hamilton (2, 3) provided a  
22 simple yet powerful framework for understanding altruism. This has since become known as  
23 Hamilton's Rule and posits that a behavior or trait will be favored by selection, when  $rb-c>0$ ,  
24 where  $c$  is the fitness cost to the actor,  $b$  is the fitness benefit to the recipient, and  $r$  is their  
25 genetic relatedness. Since then numerous studies across a very diverse range of organisms from  
26 bacteria and yeasts to ants and mammals have demonstrated that the necessary conditions for  
27 altruism are upheld (4, 1).

28 Crucial to understanding the evolution of altruism has been determining how animals  
29 distinguish kin from non-kin because  $r$  must be  $>0$  to satisfy Hamilton's rule. An unlikely tool  
30 for studying altruism, it turns out, are parasites, the very antithesis of altruistic behavior.  
31 Parasites have evolved ways to break the code within kin groups, benefiting from their altruism,  
32 despite being completely unrelated to the donor ( $r=0$ ). The classical example is the Common  
33 Cuckoo (*Cuculus canorus*) that exploits the parental behavior of other bird species through egg  
34 mimicry and selfish behaviors by the chick. In societies such as ants, where altruism is expressed  
35 from sibling to sibling, diverse parasites ranging from other ants to beetles, flies, caterpillars and  
36 even mollusks have evolved ways to break the code to act like cuckoos (5,6). For example,  
37 caterpillars (i.e. *Maculinea rebeli*) perfectly mimic the chemical profile of larval ants and are  
38 carried into the nest by foraging workers, where they are then fed colony resources and consume  
39 the larval and egg stage ants (5,7,8,9). The general term for such organisms is social parasite and  
40 studying their chemical ecology and behavior has provided many insights into the mechanisms  
41 by which altruism works.

42 Although the color pattern of a cuckoo egg or the chemical cues of caterpillars entering  
43 ant nests are impressive, it has been conceptually easy to imagine how they evolve from 'so  
44 simple a beginning' (10). Indeed Darwin considered both cuckoo and socially parasitic ants,  
45 conjecturing non-parasitic progenitors (Chapter 7). More difficult to conceptualize is whether a  
46 parasite entering the body of an altruist can be recognized as a parasite since it is within the body  
47 of a colony member who presents kin recognition cues to the rest of the colony. Here we set out  
48 to test if an ant colony can recognize siblings infected by a specialized endoparasite. We will use  
49 as our model the entomopathogenic fungus, *Ophiocordyceps unilateralis*, which is known to be a  
50 highly specialized parasite of worker ants that manipulates behavior to achieve transmission.

51 In recent years a number of studies have demonstrated that species within the complex *O.*  
52 *unilateralis s.l.* infect worker ants and adaptively manipulate behavior causing infected  
53 individuals to leave the colony and bite into vegetation before dying (11). The function of such  
54 manipulation is to provide a platform for spore release as post-mortem the fungus transitions  
55 from growing with the body to growing externally, forming a large stalk from which spores are  
56 produced and released onto the forest floor (12). Because the time from exposure and infection  
57 to behavioral manipulation is between 9 days and 3 weeks, during which time the infected ant is

58 within the colony, this model offers the potential to examine how the colony responds to infected  
59 individuals. In this study we develop a system for within colony observation of infected and  
60 healthy individuals. We show that despite their status, infected ants are neither evicted from the  
61 colony nor prevented from leaving the nest to die and spread disease to their siblings.

## 62 **RESULTS**

### 63 **Infected ants receive food from siblings**

64 We first set out to determine if infected ants received food from their siblings inside the nest  
65 area. We infected ten ants per colony in four different colonies of *Camponotus castaneus* species  
66 with a strain of *Ophiocordyceps unilateralis* fungus, which naturally infects this species in the  
67 wild (13). Ten ants were removed from the stock colony and injected with 1 $\mu$ l *O. unilateralis* in  
68 solution with Grace's insect media supplement with 10% fetal bovine serum (FBS). A further 10  
69 ants were sham treated, and inject with 1 $\mu$ l of Graces +FBS media. Both infected and sham  
70 treated ants were maintained together with 15 additional untreated individuals in a wooden  
71 chamber of volume 14.93 $\pm$  0.53 cm<sup>3</sup> placed within a cage of 451.61cm<sup>2</sup> that served as a foraging  
72 area and contained sand. These ants were given water and 10% glucose *ad libitum*. We began  
73 continuous data recording from the third day post injection until day 18, moment at which there  
74 was the least amount of infected individuals alive. Ant behavior was recorded inside the nest  
75 with GoPro Heron 2 cameras for 24 hours/day. We then scored behavior from playback on  
76 screens. We first focused on food exchange between individuals since our hypothesis was that  
77 infected ants receive food at a different rate from non-infected ants. Worker ants cannot eat solid  
78 food but instead exchange liquids in a process called trophallaxis. We followed 17 focal  
79 individuals from one colony for a total observation 976.24 hours. Using a mixed effect linear  
80 model, programmed in R, we used trophallaxis duration as a function of day post infection and  
81 using ant identification as a random effect we found no significance *p-value*=0.5156. We found  
82 no significant patterns in differences in either duration or count of trophallaxis (Figure 1). Our  
83 quantification of observations includes only within nest exchange of liquids. We did however  
84 also observe that ants infected by *O. unilateralis* would receive trophallaxis from nest mates  
85 when outside the nest. Individuals were even fed in the minutes and hours before they were  
86 behaviorally manipulated to ascend vegetation before biting into the twigs we provided and

87 dying. We therefore found no evidence that infected ants were refused food from other colony  
88 members.

### 89 **Infected ants are not attacked by siblings**

90 It might be expected that infected ants are attacked more often. Although an infected ant can  
91 only infect other ants following its own death and the subsequent growth of the stalk from its  
92 head, it is possible that the increase of fungal cells within the worker ants changes some aspect of  
93 its phenotype, such as smell, causing other ants to attack it. Because aggression might be rare and  
94 fleeting we observed the behavior of 2 colonies ( $30 \pm 5$  ants/colony) 24 hours/day for 18 days  
95 (still in progress). We saw no aggression between untreated control ants and either infected or  
96 sham treated ants. We conclude based on continuous observations over the entire course of  
97 infection that infected ants are not attacked by their siblings.

### 98 **Infected ants are initially distanced from colony members but this declines over time**

99 Although we found no aggression there might be subtle indications of infected ant segregation.  
100 To measure this we applied spatial point process approaches to within-nest ant locations,  
101 measured in millimeters. We measured the positions of  $24 \pm 2$  ants in Colony 2 every 10 minutes  
102 for day 3, 6 and 9 after infection during the day light period ( $8.09 \pm 0.43$  hours per day) using an  
103 R program that gave us x-y coordinates of the pixels within the image, which were converted to  
104 millimeters. We then asked if infected ants were further away from controls or sham treated ants.  
105 We used point process models, which takes a set of point locations in window of space. Each of  
106 these points can be labeled with a mark to indicate a certain type or class. In this case, the ant  
107 locations are the points of interest, the window of observation is the nest, and the mark of each  
108 ant is their infection status; either untreated, infected, or sham treated. In point process statistics,  
109 the interaction between points can be measured using a summary statistic called the K-function  
110 (14, 15). For a given distance  $d$ , the K-function gives the expected number of additional ants to  
111 be found within a radius of  $d$  of a focal ant. To examine spatial interaction behavior between  
112 healthy and infected ants, we examine the K-cross function (14, 15) between healthy and  
113 infected ants, which is the expected number of infected ants that would be found within a  
114 distance  $d$  of each healthy ant.

115 We are interested in whether the class of the ant (e.g. healthy or infected) impacts their behavior  
116 relative to each other. Our null hypothesis is that ant infection status does not affect the tendency  
117 to group together or avoid other ants. We used a nonparametric permutation test (15) to test for  
118 significant deviation from this null behavior. In Figure 2 we show the observed K-cross function  
119 (in red) for all the data, as well as for days 3, 6, and 9, together with 1000 K-cross functions (in  
120 black) simulated from the null model by randomly permuting the labels (e.g., healthy, infected,  
121 or sham) of the ants 1000 times, and calculating the K-cross function between healthy and  
122 infected ants under each of these permutations. Significant deviation from the null model is  
123 indicated by an observed K-function that lies on the edges (tails) of the envelope of K-functions  
124 simulated under the null model, and empirical  $p$ -values can be computed by considering the rank  
125 of the observed K-function within the envelope. The K-function examines potential spatial  
126 interaction behavior at multiple spatial scales. In Figure 2, the observed K-functions in general  
127 lie well within the envelope of simulated K-functions from the null distribution; however, on  
128 day 3 at short spatial distances (less than 8 millimeters), the observed K-function lies on the  
129 lower tail of the permuted K-functions, suggesting spatial segregation at small spatial scales.

130 To examine this potential small-scale ant interaction behavior between healthy and infected ants,  
131 we found the nearest neighbor to each ant at each time point. We then tested for deviation from  
132 the null assumption that ants are equally likely to have any other ant as nearest neighbor by again  
133 permuting the ant labels at each time point and recording the permuted label of each ant's nearest  
134 neighbor. Table 1 shows the proportion of healthy ants with an infected nearest neighbor over  
135 all observed days, and for day 3, day 6, and day 9, together with the empirical  $p$ -value under the  
136 null, obtained using 1000 permutations of ant labels at each time point of observation. We see  
137 significant differences on day 3 and when we pool all the data together.

## 138 **DISCUSSION**

139 Our data suggests no aggression towards infected individuals. We also see no distinct differences  
140 in the mean duration or counts of trophallaxis between infected and uninfected individuals ( $p$ -  
141 value=0.5156). Our linear mixed effect model shows trophallaxis had no relation with treatment  
142 and trophallaxis is stochastic. Other studies have used trophallaxis as a tool to study social  
143 immunity, making similar observations to the ones we have made here, yet their results are an  
144 increase the amount of trophallaxis that occurs 24 hours after infection with a fungal pathogen

145 (16, 17). An important factor these papers did not take into account is time, they only made  
146 observation 24 hours after the infection, this experiment other hand observed the ontogeny of  
147 behavior within the nest. By using a one chamber scenario in a cage where ants were able to  
148 freely move and interact with one another enables us to observe more naturalistic interactions  
149 that has been lacking in the ant-pathogen research.

150 Our data suggest there are no sifts in behavioral towards infected individuals, suggesting healthy  
151 individuals are unable to detect *Ophiocordyceps* infection. The spatial point process analysis  
152 revealed that by and large there is no evidence for spatial segregation of infected ants. The only  
153 exception was the slight differences in spatial segregation between healthy individuals and those  
154 infected at small spatial scales on day 3 of the infection, but not on days 6 and 9. These minute  
155 changes in spatial arrangement could be caused by changes in individual infect ant behavior and  
156 are not likely to be indicators of social exclusion, which we would expect to increase in strength  
157 within the time from infection. We did not test for any relationship between spatial segregation  
158 and the identity of the focal individuals in relation to who perform the most trophallaxis. Data  
159 collection for both trophallaxis and distance data were collected on Colony 2 the sample sizes we  
160 have may be masking the effect of *Ophiocordyceps* on the infected individuals.

161 Within nest distance observations has been done before by using images to determine spatial  
162 fidelity and time budgets of *Leptothorax acervorum* (18, 19), their observations did not take into  
163 account how pathogens may change social dynamics within a colony nor did they do continuous  
164 behavioral observations. We were able to observe rare interactions and behaviors that have  
165 previously not been described. Being able to follow individuals through time and space lends  
166 itself to be a powerful tool for further understanding the ontogeny of behavior within infected  
167 individuals. Although our trophallaxis and distance results were not significant we can still  
168 progress our understanding between uninfected individuals and those being parasitized.

169 In order to establish if these results are caused by the evolutionary history between  
170 *Ophiocordyceps* and host we should observe non-coevolved pathogen species. These behavioral  
171 assays enable us to further explore the role of parasites in not only the behavioral of the single  
172 host, but also in the colony host. The ability to combine behavioral observation and spatial  
173 dynamics as a tool to make very fine detailed observations enables us to further tease out the

174 dynamics of the colony and those infected. Another powerful tool that we could add to this type  
175 of behavioral assay is chemical cues, such as cuticular hydrocarbons.  
176 Chemical communication is the method of communication within an ant colony (20,21).  
177 Therefore individual odor changes could signify caste allocation (22) and colony members could  
178 also use it as a methods to determine health. Using continuous, detailed observations and  
179 cuticular hydrocarbons would give insight into how these infected individuals are perceived by  
180 their nest mates.

181

## 182 **METHODS AND MATERIALS**

183 **Ant collection and stock colony maintenance-** Ants were collected in South Carolina during  
184 October 2012. Colonies were collected by following foragers to nest sites that were then dug up.  
185 Colony 1 consisted of sexuals, brood and about 120 workers; collected 10/4/2012. Colony 2  
186 formed by 100 workers and brood; collected 10/5/2012. Colony 3 formed by 100 workers and  
187 brood; collected 10/3/2012. Colony 4 has queen, brood and 120 workers. Colonies were  
188 maintained by providing them sugar water and water ad libitum and changed once a week. From  
189 these colonies we collected individuals to run our experiment on.

190 **Infection techniques-** *O. unilateralis* Infections were done as described in de Bekker *et al.*,  
191 2014/submitted. Single fungal colonies were placed in a sterile 2 mL tube with two 8/32 inch  
192 metal balls (Wheels Manufacturing Inc.) and 200  $\mu$ L Grace's medium (Sigma) freshly  
193 supplemented with 10% FBS (PAA laboratories Inc.). The colony tissue was lysed using  
194 TissueLyser II (Qiagen) at room temperature for 60 sec. at 30 freq/sec. This processed enabled  
195 us to obtain single hyphae used at a mean concentration of  $3.9 \times 10^7 \pm 1.1 \times 10^7$  hyphae/ml for  
196 infection. Infections were done by injecting 1  $\mu$ L hyphal solution with a laser pulled 10  $\mu$ L  
197 micropipette (Drummond) and aspirator tube (Drummond) into the thorax underneath the front  
198 legs. Sham treatments were done in similar fashion using 1  $\mu$ L medium without hyphae (23).

199 **Treatments and individual identification-** Subcolonies were made of fifteen healthy, ten  
200 injected with Graces+FBS media used for *Ophiocordyceps* growth in the laboratory and another  
201 ten were injected with *Ophiocordyceps* plus media. These individuals were collected by their  
202 colonies by agitating the housing tubes within each colony had and collect the individuals that

203 from the population. In order to follow individuals through time we used a dot system, each  
204 individual had a different dot pattern painted on its body. We used an edding® 751 paint marker  
205 to label the ants we used for the experiment.

206 **Behavioral observation set up-** We created sub-colonies containing 35 worker ants within a  
207 wooden cage with a volume of  $14.93 \pm 0.53 \text{ cm}^3$ . In order to make 24 hour observations we used  
208 a Go Pro camera (Hero 2 with IR lens) and an IR lamp was used for nocturnal observations. The  
209 camera was located on top of the colony chamber and removed to change size video card three  
210 times a day.

211 **Trophallaxis-** There was only one observer who made the observations of trophallaxis to reduce  
212 observer bias. Trophallaxis was classified as starting when labrum was exposed and distended  
213 between the two individuals. The event was as over when the mouth parts separated and the  
214 individual parted ways. We observed a total of 976.24 hours of video for Colony 2 in order to  
215 determine the amount of trophallaxis focal individuals were receiving on days 3-9,12,15 and 18  
216 in trial one. A total of seven Infected individuals and five sham treated and five healthy ants  
217 were followed over the course of the daylight session ( $7.68 \pm 0.32$  hours per day) on days  
218 3,4,5,6,7,8,9,12,15 and 18 post injection. We analyzed days 3-9 since these are the days we have  
219 most infected individuals inside the nest (Figure 1). The chambers in which ants were placed did  
220 not restrict individuals to stay within the nest, we were only able to record behaviors for those  
221 present within the nest at the time of observation.

222 **Aggression-** There was only one observer who took note of aggressive behavior to reduce  
223 observational bias. The videos were observed in fast forward and stopped if any abnormal  
224 behavior occurred. Colony 2 has a total of 76.77 hours observed and no aggression has been  
225 seen. Further observations will be made in other colonies to see if non-aggression holds.

226 **Distanc data collection-** Screen shots were made for every ten minutes of observation during the  
227 day period ( $8.24 \pm 0.34$  hours per day). Individuals were identified using paint marks. We then  
228 used an R program (version 2.15.1; created by Kezia Manlove) that calculated both pair-wise  
229 distances and x-y coordinates for the individuals within the chamber. On average there were  
230  $24 \pm 2$  individuals inside the chamber, we recorded point distances on all the individuals visible to  
231 us on days 3, 6, 9 and 12 for a total of 4,758 x-y coordinates and 61,000 pair-wise data points.



232 **Distance data analysis-** We focused on days 3, 6 and 9 ( $8.09 \pm 0.43$  hours per day) when  
233 analyzing the data. Functions to compute the K-cross function from healthy to infected ants, and  
234 the nearest neighbor to each ant at each time point, were created in R. The K-cross function finds  
235 the average number of infected ants within a specified distance of a healthy ant, with the average  
236 being over all healthy ants in the chamber at each time point, and over all time points within the  
237 specified day. The permutation tests for the nearest-neighbor analysis were carried out by  
238 permuting the labels (healthy, infected, or control) of ants in the chamber at each time point and  
239 re-computing the nearest neighbor of each ant.

## 240 REFERENCES

- 241 1. Bourke AFG (2011) Principles of Social Evolution. *Oxford, Oxford University Press.*
- 242 2. Hamilton WD (1963) Evolution of Altruistic Behavior. *American Naturalist*, **97**(896):354-  
243 356
- 244 3. Hamilton WD (1964) The genetical evolution of social behaviour. I & II. *Journal of*  
245 *Theoretical Biology*, **7**:1-52.
- 246 4. Foster KR, Wenseleers T, Ratnieks FLW (2006) Kin selection is the key to altruism. *Trends*  
247 *in Ecology & Evolution* 2006, **21**(2):57-60.\*
- 248 5. Guillem RM, Drijfhout F, Martin SJ (2014) Chemical deception among ant social parasites.  
249 *Current Zoology*, 60.
- 250 6. Foitzik S, DeHeer CJ, Hunjan DN, Herbers JM (2001) Coevolution in host–parasite systems:  
251 behavioural strategies of slave–making ants and their hosts. *Proceedings of the Royal Society*  
252 *of London Series B: Biological Sciences*, **268**(1472):1139-1146.
- 253 7. Als TD, Vila R, Kandul NP, Nash DR, Yen S-H, Hsu Y-F, Mignault AA, Boomsma JJ,  
254 Pierce NE (2004) The evolution of alternative parasitic life histories in large blue butterflies.  
255 *Nature*, **432**(7015):386-390.
- 256 8. Nash DR, Als TD, Maile R, Jones GR, Boomsma JJ (2008) A mosaic of chemical  
257 coevolution in a large blue butterfly. *Science*, **319**(5859):88-90.
- 258 9. Gilbert OM, Foster KR, Mehdiabadi NJ, Strassmann JE, Queller DC (2007) High relatedness  
259 maintains multicellular cooperation in a social amoeba by controlling cheater mutants. *PNAS*,  
260 **104**: 8913-8917.
- 261 10. Darwin C (1859) On the Origin of Species by Means of Natural Selection, or the  
262 Preservation of Favoured Races in the Struggle for Life. *London: John Murray.*

- 263 11. Hughes DP, Andersen S, Hywel-Jones NL, Himaman W, Billen J, Boomsma JJ (2011)  
264 Behavioral mechanisms and morphological symptoms of zombie ants dying from fungal  
265 infection. *BMC Ecology*, **11**: 13.
- 266 12. Andersen, SB, S. Gerritsma, K.M. Yusah, D. Mayntz, N.L. Hywel-Jones, J. Billen, J.J.  
267 Boomsma, D.P. Hughes (2009). The life of a dead ant – the expression of an extended  
268 phenotype. *American Naturalist* 174: 424–433
- 269 13. Evans HC, Elliot SL, Hughes DP (2011). *Ophiocordyceps unilateralis*. *Communicative &*  
270 *Interactive Biology*, **4**: 5, 598-602.
- 271 14. Gaetan, C. and X. Guyon (2010). Spatial Statistics and Modeling. *Springer*.
- 272 15. Givens, G.H. and J.A. Hoeting (2012). Computational Statistics. *John Wiley and Sons*.
- 273 16. Hamilton C, Lejeune BT, Rosengaus BR (2011). Trophallaxis and prophylaxis:social  
274 immunity in the carpenter ant *Camponotus pennsylvanicus*. *Biology letters*, **7**: 89-92.
- 275 17. de Souza DJ, Vlaenderen JV, Moret Y, Lenoir A (2008). Immune response affects ant  
276 trophallactic behavior. *Insect Pathology*, **54**, 828-832.
- 277 18. Sedova-Franks AB, Franks NR (1995). Demonstrating new social interactions in ant  
278 colonies through randomization tests: separating seeing from believing. *Animal behavior*,  
279 **50**, 1683-1696.
- 280 19. Franks NR, Bryant S, Griffiths R. Synchronization of behavior within nests os the ant  
281 *Leptothorax acervorum* (Fabricius)- I. Discovering the phenomenon and its relation to the  
282 level of starvation. *Bulletin of mathematical biology*, **52**:5, 597-612.
- 283 20. Hölldobler,B. and Wilson, E.O (1990) The ants.Cambridge, MA:Belknap Press, Harvard  
284 University.
- 285 21. Hölldobler,B. and Wilson, E.O (2009) The Superorganism. London: WW Norton.
- 286 22. Greene MJ, Gordon DM (2007). Interaction rate informs harvester ant task decisions.  
287 *Behavioral Ecology*, **18**(2), 451-455.
- 288 23. de Bekker C, Quevillion L, Smith PB, Fleming K, Ghosh Debashis, Patterson AD, Hughes  
289 DP (2014) Species specifi ant brain manipulation by a specialized fungal parasite In review

290

## 291 **GRAPHS AND TABLES**

292

293 **Figure 1-** Trophallaxis data collected from videos on days 3-9, error bard represent the standard  
 294 error of the data. We were unable to see any significance difference between treated individuals  
 295 and healthy. (A) Shows no differences between infected, graces and healthy ants although we do  
 296 see an interesting pattern of duration increase on day 4 and 8. (B) Mean count of trophallaxis  
 297 changes slightly throughout the days we have observed. (C) The proportion of time spent in  
 298 trophallaxis.

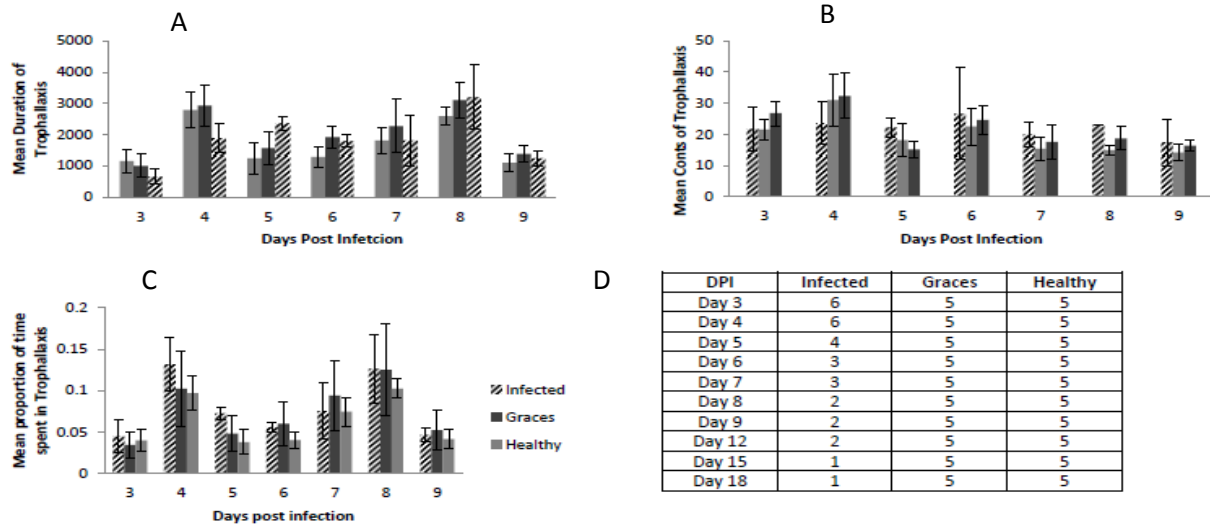

300 **Figure 2-** K function analysis

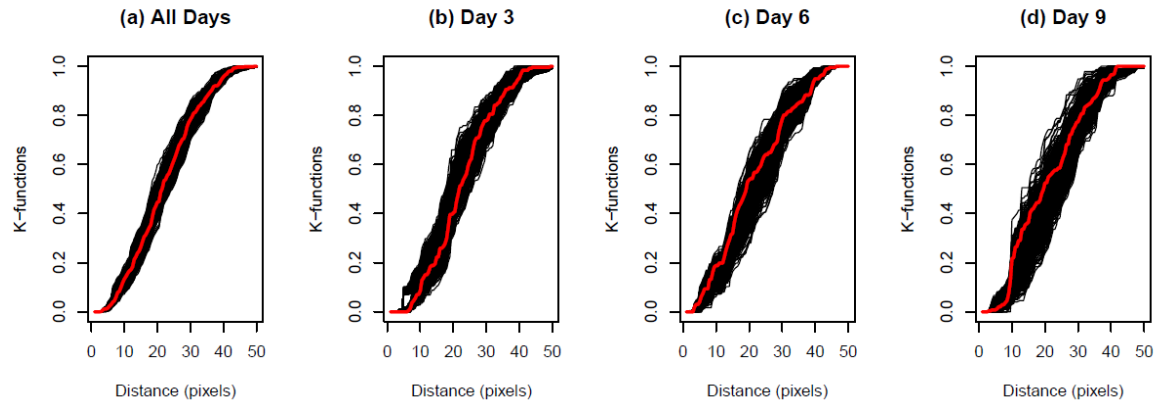

301

302

303

304

305 **Table 1-** Nearest neighbor analysis we can see there is a significant difference between healthy  
306 and infected on when looking at all three days combined and only on day 3.

| Time     | Proportion | Permutation Test p-value |
|----------|------------|--------------------------|
| All Days | 0.110      | 0.002                    |
| Day 3    | 0.108      | 0.004                    |
| Day 6    | 0.208      | 0.48                     |
| Day 9    | 0.104      | 0.24                     |

307
